# Supplementary material for: Loss of progesterone receptor membrane component 1 promotes hepatic steatosis via the induced de novo lipogenesis
Source: PubMed Central journal article supplement (PMC6200820; doi:10.1038/s41598-018-34148-6), 2018-10-24

**Supplementary Information**

**Loss of progesterone receptor membrane component 1 promotes  
hepatic steatosis via the induced *de novo* lipogenesis**

**Sang R. Lee<sup>1</sup>, Sun Woo Kwon<sup>1</sup>, Pelin Kaya<sup>1</sup>, Young Ho Lee<sup>1</sup>, Jong Geol Lee<sup>2</sup>, Globinna Kim<sup>2</sup>, In-  
Jeoung Baek<sup>2\*</sup>, and Eui-Ju Hong<sup>1\*</sup>**

<sup>1</sup>Laboratory of Biochemistry, College of Veterinary Medicine, Chungnam National  
University, Daejeon 34134, Republic of Korea

<sup>2</sup>Department of Convergence Medicine, University of Ulsan College of Medicine, Asan  
Medical Center, Seoul 05505, Republic of Korea.

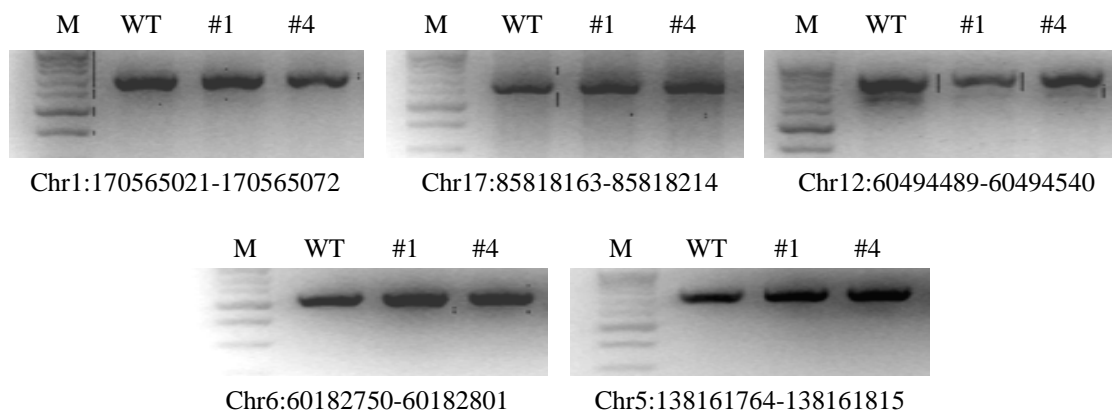

Fig. S1. Analysis of off-target effects of TALEN targeting the *Pgrmc1* gene. T7E1 assays examining the putative off-target effects of *Pgrmc1*-TALEN. The integrity of potential off-target sites as listed in Table 1 was examined in founder mice.

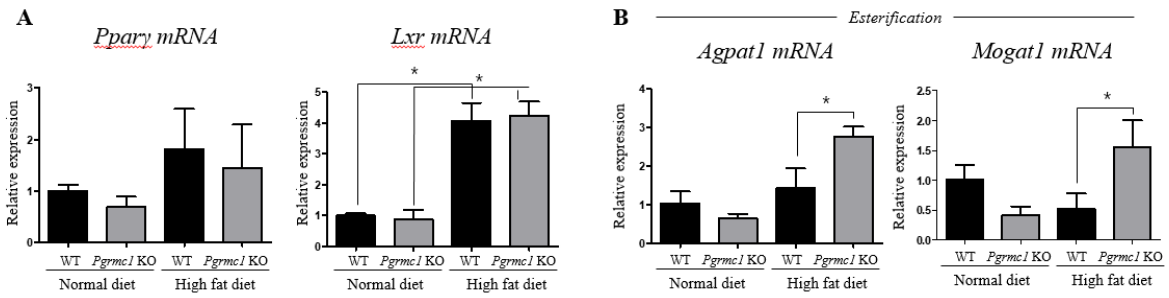

Fig. S2. Transcriptional regulators and TG esterification enzymes related to *Srebp1* gene. Major fatty acid synthesis transcriptional regulator genes which are on the crosstalk with SREBP-1 (A). Genes regulates TG esterification in liver (B). After fed a high fat diet for 1 month, mRNA levels were determined by quantitative RT-PCR. *Rplp0* mRNA was used as an internal control. Values represent means  $\pm$  SD at least 3 experiments. \*,  $P < 0.05$ . Number of mice used in experiment for normal diet group is at least 3 and for high fat diet groups is at least 4 for each group.

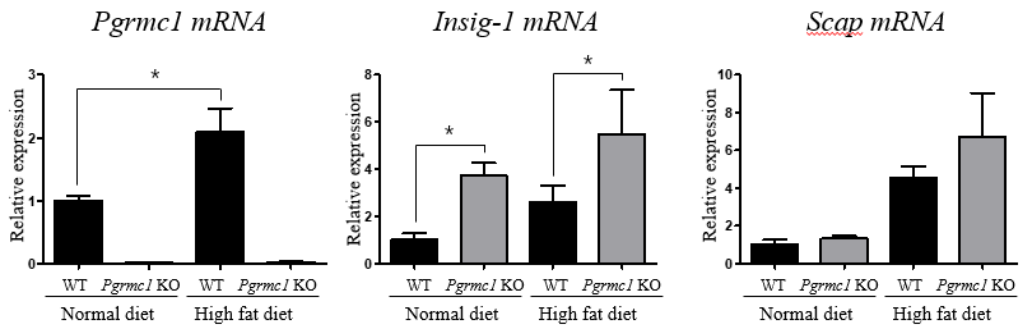

Fig. S3. Structural components related to *Srebp-1* gene. Genes forming complex with *Srebp-1* in endoplasmic reticulum. After fed a high fat diet for 1 month, mRNA levels were determined by quantitative RT-PCR. *Rplp0* mRNA was used as an internal control. Values represent means  $\pm$  SD at least 3 experiments. \*,  $P < 0.05$ . Number of mice used in experiment for normal diet group is at least 3 and for high fat diet groups is at least 4 for each group.

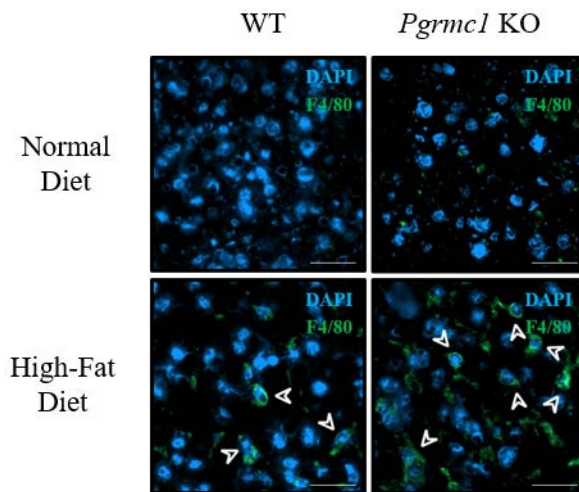

Fig. S4. Immunofluorescence staining of mouse macrophage marker, F4/80. Cytoplasm stained with green represents positive for F4/80. Nucleus stained with blue representing DAPI was used as an internal control. Number of mice used in experiment for normal diet group is at least 3 and for high fat diet groups is at least 4 for each group.

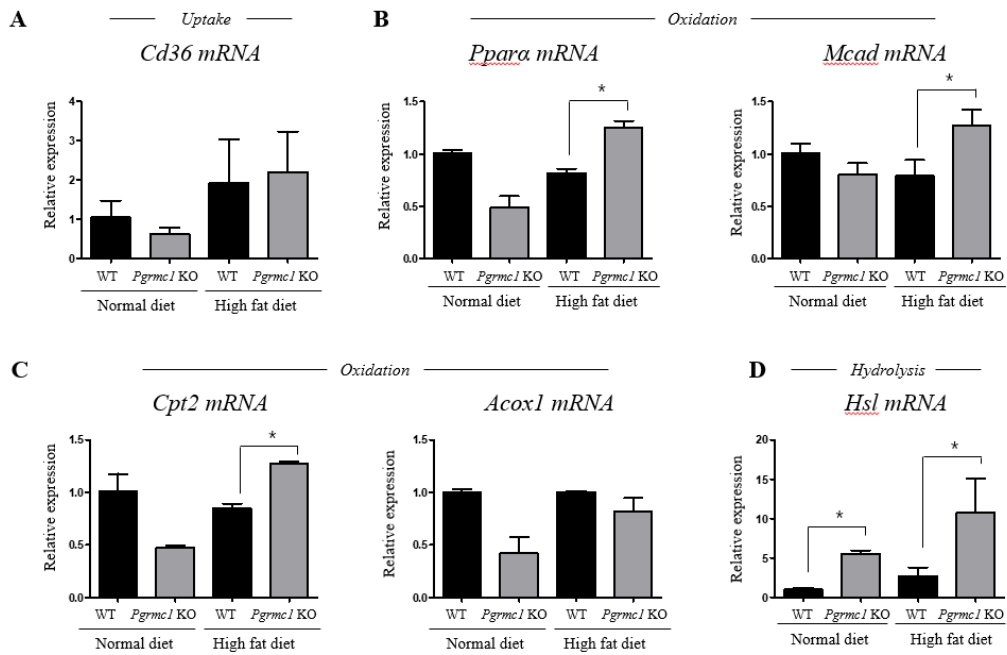

Fig. S5. Levels of fatty acid metabolic genes increased with TG accumulation. Genes related to fatty acid uptake, oxidation, and hydrolysis (A - D). After fed a high fat diet for 1 month, mRNA levels were determined by quantitative RT-PCR. *Rplp0* mRNA was used as an internal control. Values represent means  $\pm$  SD at least 3 experiments. \*,  $P < 0.05$ . Number of mice used in experiment for normal diet group is at least 3 and for high fat diet groups is at least 4 for each group.

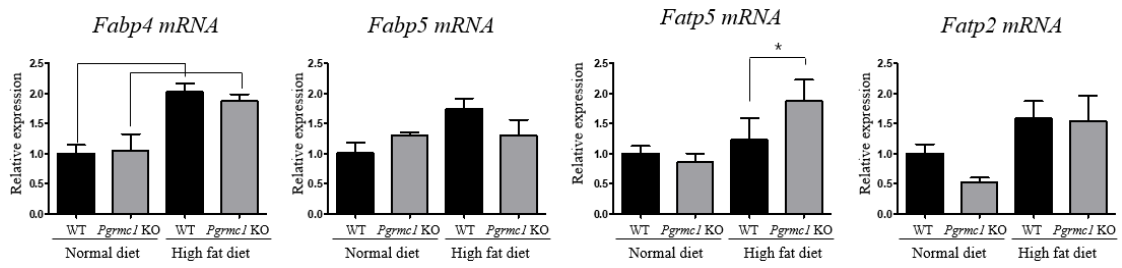

Fig. S6. Levels of fatty acid transport related genes. After fed a high fat diet for 1 month, mRNA levels were determined by quantitative RT-PCR. *Rplp0* mRNA was used as an internal control. Values represent means  $\pm$  SD at least 3 experiments. \*,  $P < 0.05$ . Number of mice used in experiment for normal diet group is at least 3 and for high fat diet groups is at least 4 for each group.

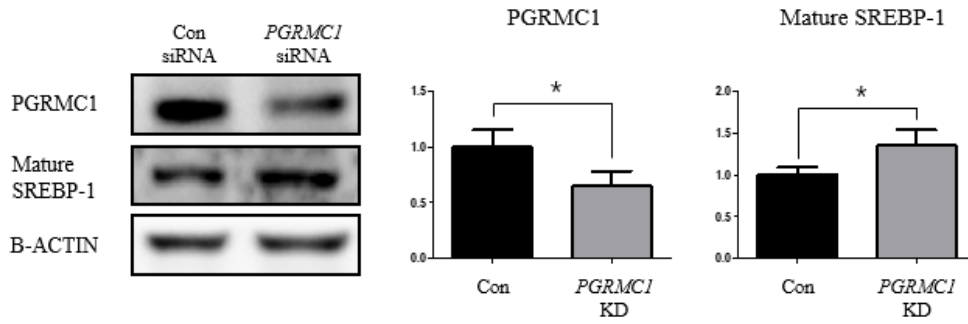

Fig. S7. Level of mature SREBP-1 protein in *PGRMC1* siRNA transfection. After transfected with siRNA, cells were treated with fatty acids (Palmitic acid; 330 $\mu$ M, Oleic acid; 660 $\mu$ M) for 24 hrs. Beta actin was used as an internal control. Values represent means  $\pm$  SD at least 3 experiments. \*, P<0.05. All experiments were repeated at least 3 times.



Fig. 1B

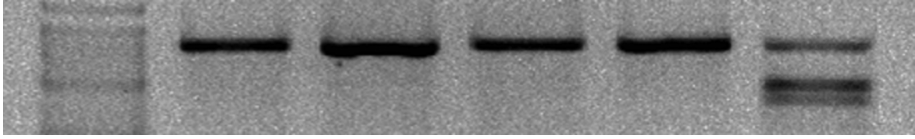

Fig. 1C

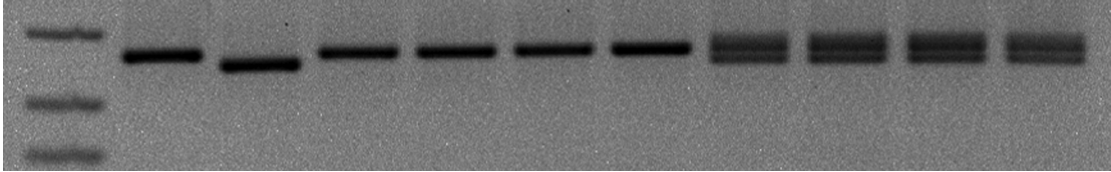

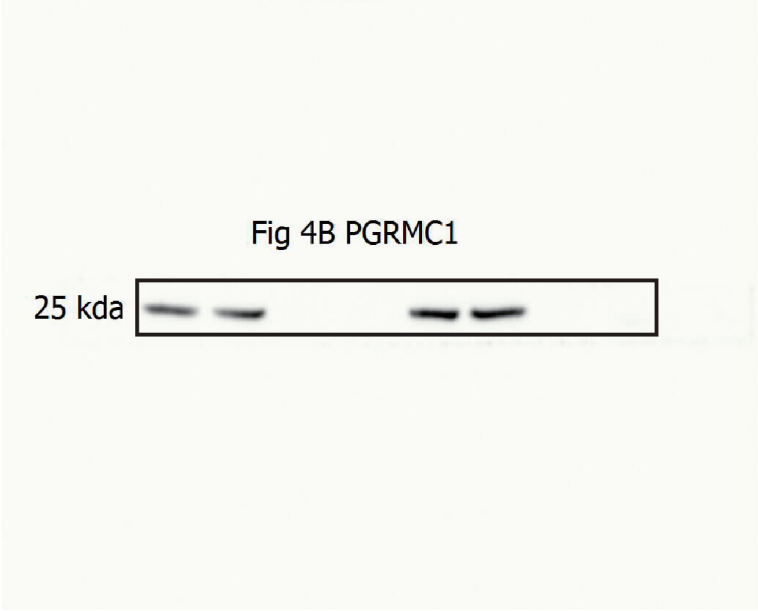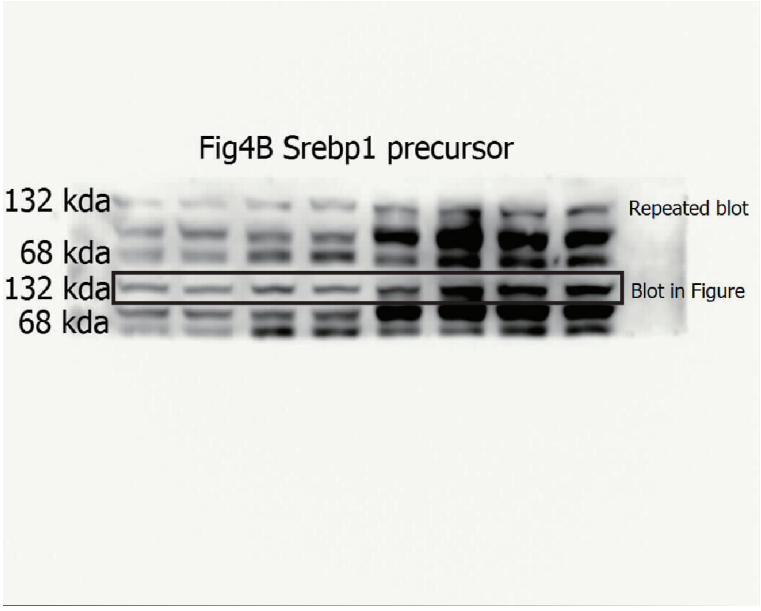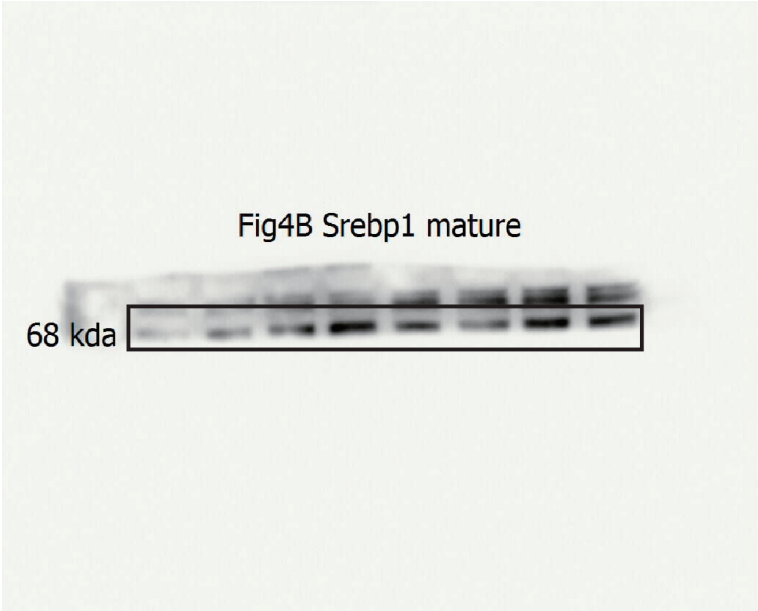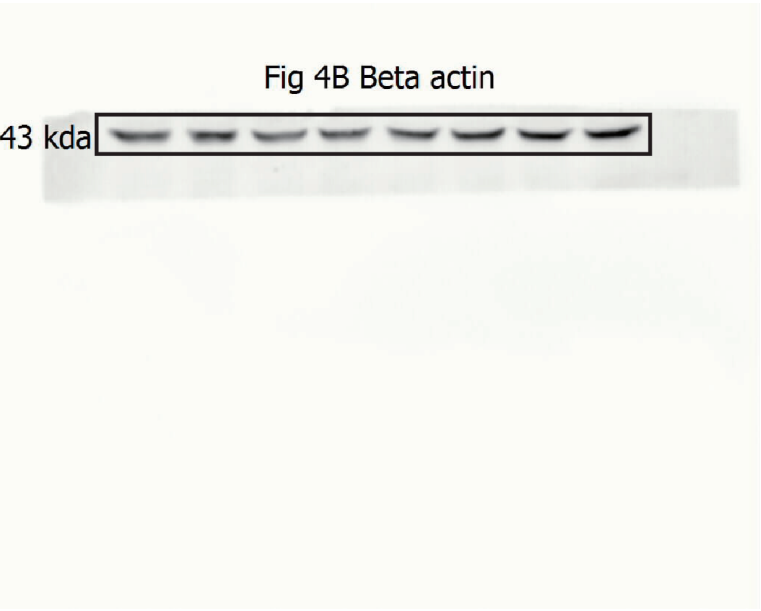

Fig7E PGRMC1

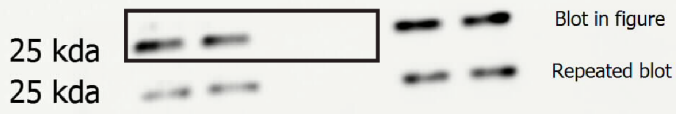

Fig7E Srebp1 mature

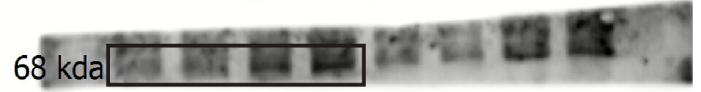

Fig 7E Beta actin

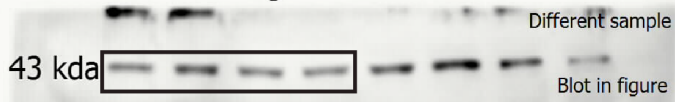

Fig7F PGRMC1

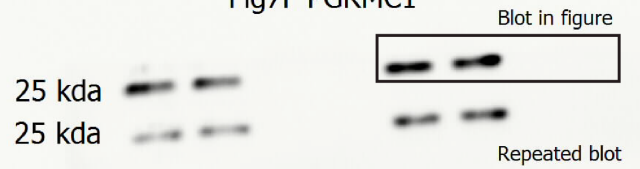

Fig7F Srebp1 mature

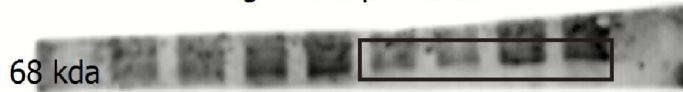

Fig7F Beta actin

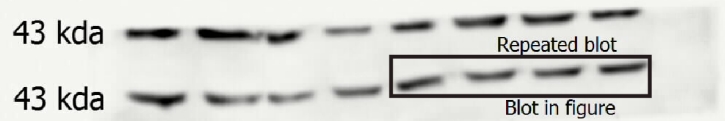

Fig S1

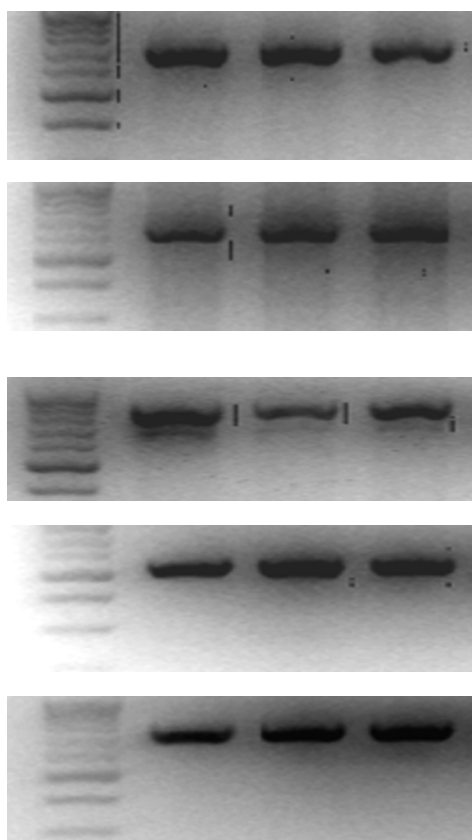

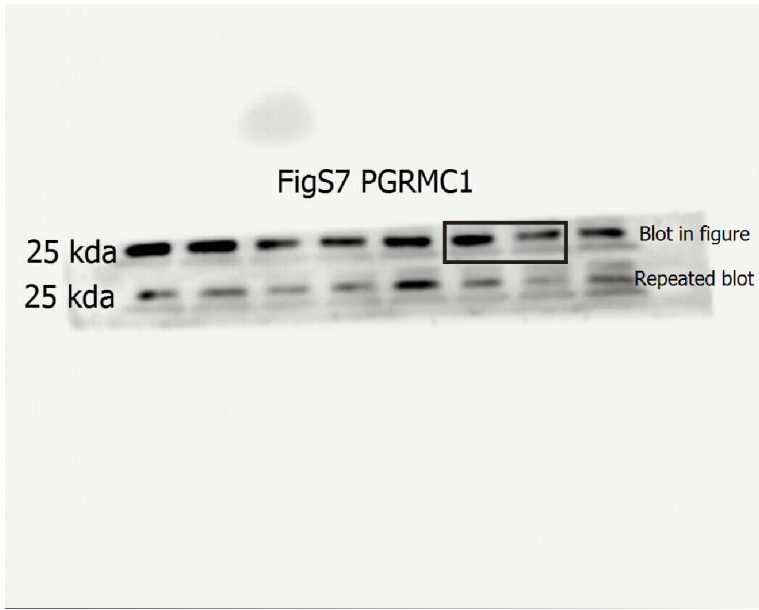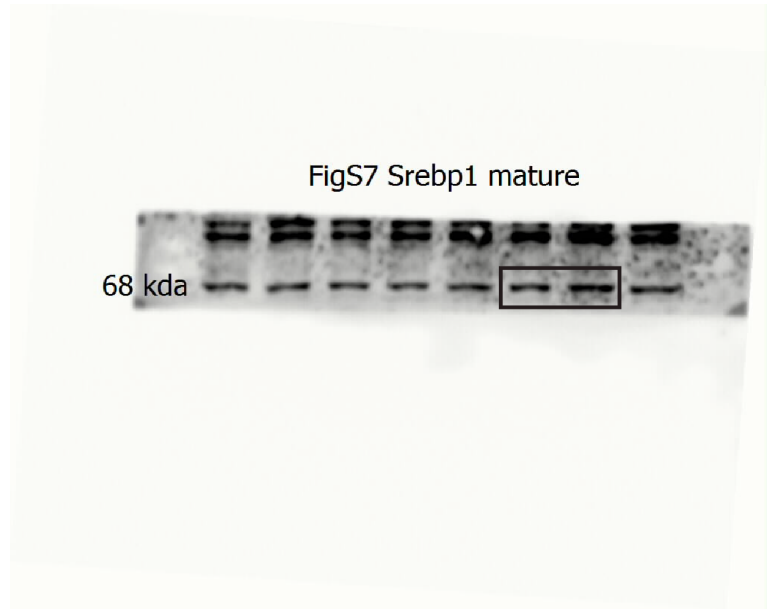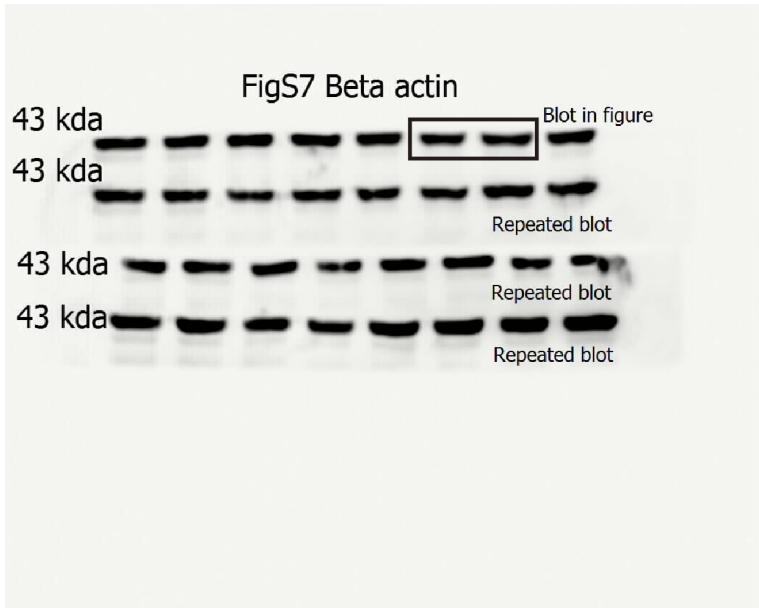

Supplement: 41598_2018_34148_MOESM1_ESM.pdf [file 41598_2018_34148_MOESM1_ESM.pdf]
